# Supplementary material
Source: PubMed Central journal article supplement (PMC6429670)
Supplement: DS_10.1177_0022034519828731.pdf [file DS_10.1177_0022034519828731.pdf]

# Experimental methods to inform diagnostic approaches for painful TMJ OA

## Appendix

### Appendix Table

Primary concerns regarding the clinical utility and reliability of the DC/TMD guidelines (Schiffman et al. 2014), which are revised from the RDC/TMD guidelines (Dworkin and LeResche 1992).

| Guideline                                             | Benefits                                                                                                                                                                                                                                                                                                                                                                                                                                                        | Disadvantages                                                                                                                                                                                                                                                                                                                                                                                                                       |
|-------------------------------------------------------|-----------------------------------------------------------------------------------------------------------------------------------------------------------------------------------------------------------------------------------------------------------------------------------------------------------------------------------------------------------------------------------------------------------------------------------------------------------------|-------------------------------------------------------------------------------------------------------------------------------------------------------------------------------------------------------------------------------------------------------------------------------------------------------------------------------------------------------------------------------------------------------------------------------------|
| <b>Pain assessed primarily by palpation</b>           | <ul style="list-style-type: none"> <li>• Temporalis and masseter muscles are logical sites to palpate because they are most clinically relevant and are highly accessible (Steenks et al. 2018)</li> </ul>                                                                                                                                                                                                                                                      | <ul style="list-style-type: none"> <li>• Pain assessment by palpation restricts evaluation to a single dimension: pain on pressure (Steenks et al. 2018)</li> <li>• Pain provoked by palpation may not be equivalent to pain provoked by functional loading (Steenks et al. 2018)</li> <li>• Testing certain muscle sites may produce pain even in healthy patients, for example, the lateral pole (Steenks et al. 2018)</li> </ul> |
| <b>Pain &amp; dysfunction are assessed separately</b> | <ul style="list-style-type: none"> <li>• Pain with functional movements may produce a different pain complaint than that which motivated the patient to seek care (Okeson 2018)</li> <li>• Pain and dysfunction can be inappropriately linked, such as in intracapsular disorders that present without pain (Okeson 2018)</li> <li>• The current criteria require a history of pain altered by jaw movement or function (Schiffman and Ohrbach 2018)</li> </ul> | <ul style="list-style-type: none"> <li>• High likelihood of multiple diagnoses (Steenks et al. 2018)</li> <li>• Diagnostic error (Steenks et al. 2018)</li> </ul>                                                                                                                                                                                                                                                                   |

## References

Dworkin S, LeResche L. 1992. Research diagnostic criteria for temporomandibular disorders: Review criteria, examinations and specifications, critique. *J Craniomandib Disord.* 6:301–355.

Okeson J. 2018. Critical Commentary 1: Reliability and Validity of the DC/TMD Axis I. *J Oral Facial Pain Headache.* 32(1):19–21.

Schiffman E, Ohrbach R, Truelove E, Look J, Anderson G, Goulet J-P, List T, Svensson P, Gonzalez Y, Lobbezoo F, et al. 2014. Diagnostic Criteria for Temporomandibular Disorders (DC/TMD) for Clinical and Research Applications: Recommendations of the International RDC/TMD Consortium Network\* and Orofacial Pain Special Interest Group†. *J Oral Facial Pain Headache.* 28(1):6–27.

Schiffman EL, Ohrbach R. 2018. Critical Commentary 2: Reliability and Validity of the DC/TMD Axis I. *J Oral Facial Pain Headache.* 32(1):22–24.

Steenks M, Türp J, de Wijer A. 2018. Reliability and Validity of the Diagnostic Criteria for Temporomandibular Disorders Axis I in Clinical and Research Settings: A Critical Appraisal. *J Oral Facial Pain Headache.* 32(1):7–18.
